# Supplementary material for: Predictive Value of SLCO1B1 c.521T>C Polymorphism on Observed Changes in the Treatment of 1136 Statin-Users
Source: MDPI journal article supplement (doi:10.3390/genes14020456), 2023-02-10
Supplement: s1 [file s1]

## Predictive value of *SLCO1B1* c.521T>C polymorphism on observed changes in the treatment of 1136 statin-users

### Supplementary

Supplementary Table S1. Sample size calculation based on Link *et al.* (2008) in a population of patients receiving 80 mg of simvastatin daily.

|                     | Controls | Cases | Total |
|---------------------|----------|-------|-------|
| T                   | 157      | 93    | 250   |
| C                   | 23       | 77    | 100   |
| Total               | 180      | 170   | 350   |
|                     |          |       |       |
| C allele proportion | 13%      | 45%   |       |
| Needed sample size  | 39       | 41    | 80    |

Supplementary Table S2. Calculation Hardy Weinberg Equilibrium

|    |     |       |          |
|----|-----|-------|----------|
| TT | 789 | TTexp | 789,4445 |
| TC | 316 | TCexp | 315,1109 |
| CC | 31  | CCexp | 31,44454 |

|   |          |   |      |
|---|----------|---|------|
| p | 0,833627 | n | 1136 |
| q | 0,166373 |   |      |

|             |       |         |          |
|-------------|-------|---------|----------|
| Chi-squared | 0,009 | p-value | 0,995488 |
|-------------|-------|---------|----------|
